# Supplementary figures and images for: Broadband light absorption in cadmium telluride thin-film solar cells via composite light trapping techniques
Source: Royal Society of Chemistry journal article supplement (doi:10.1039/d5na00325c), 2025-12-09

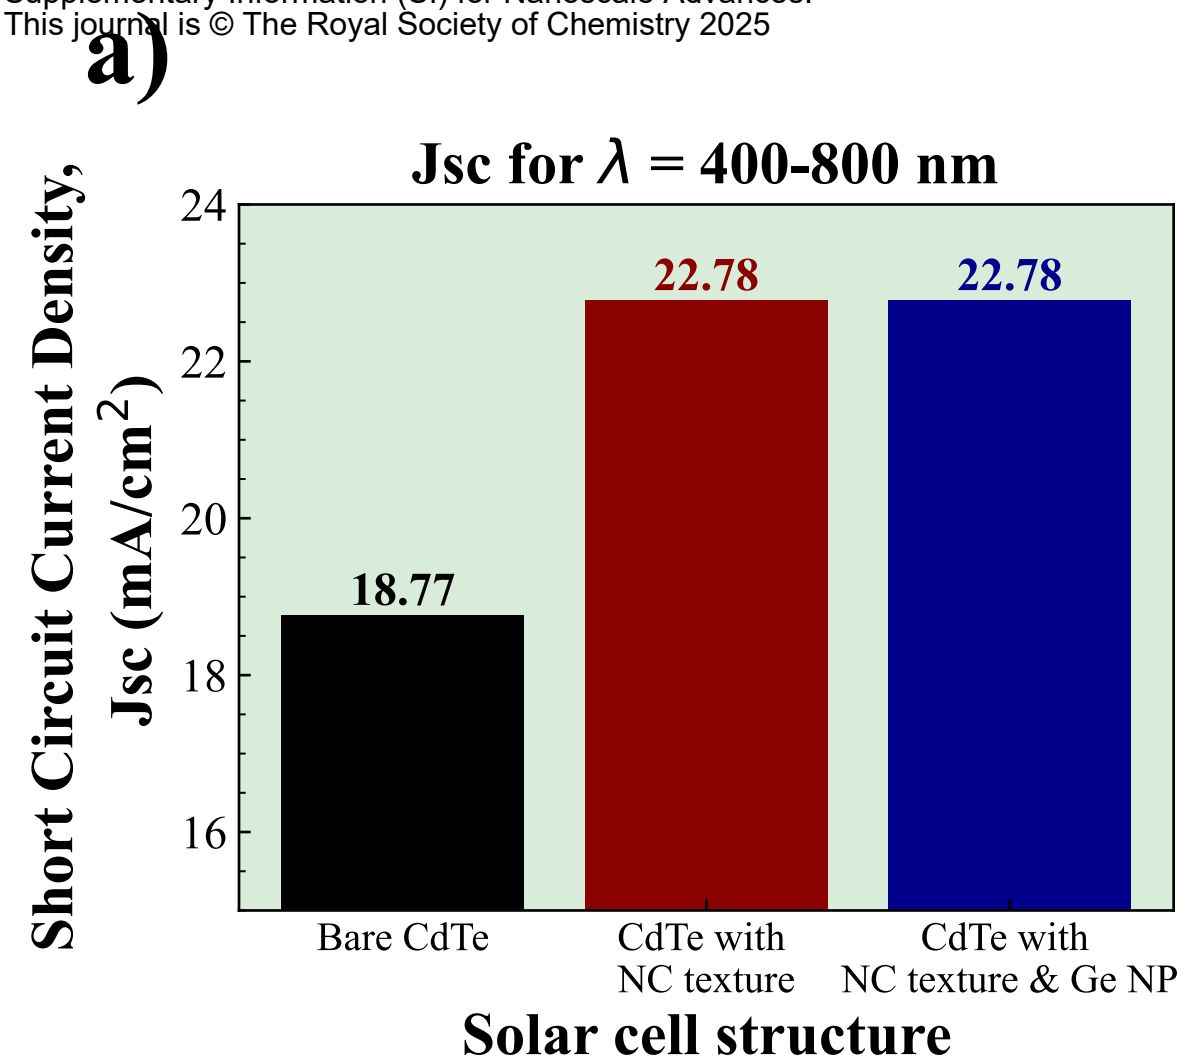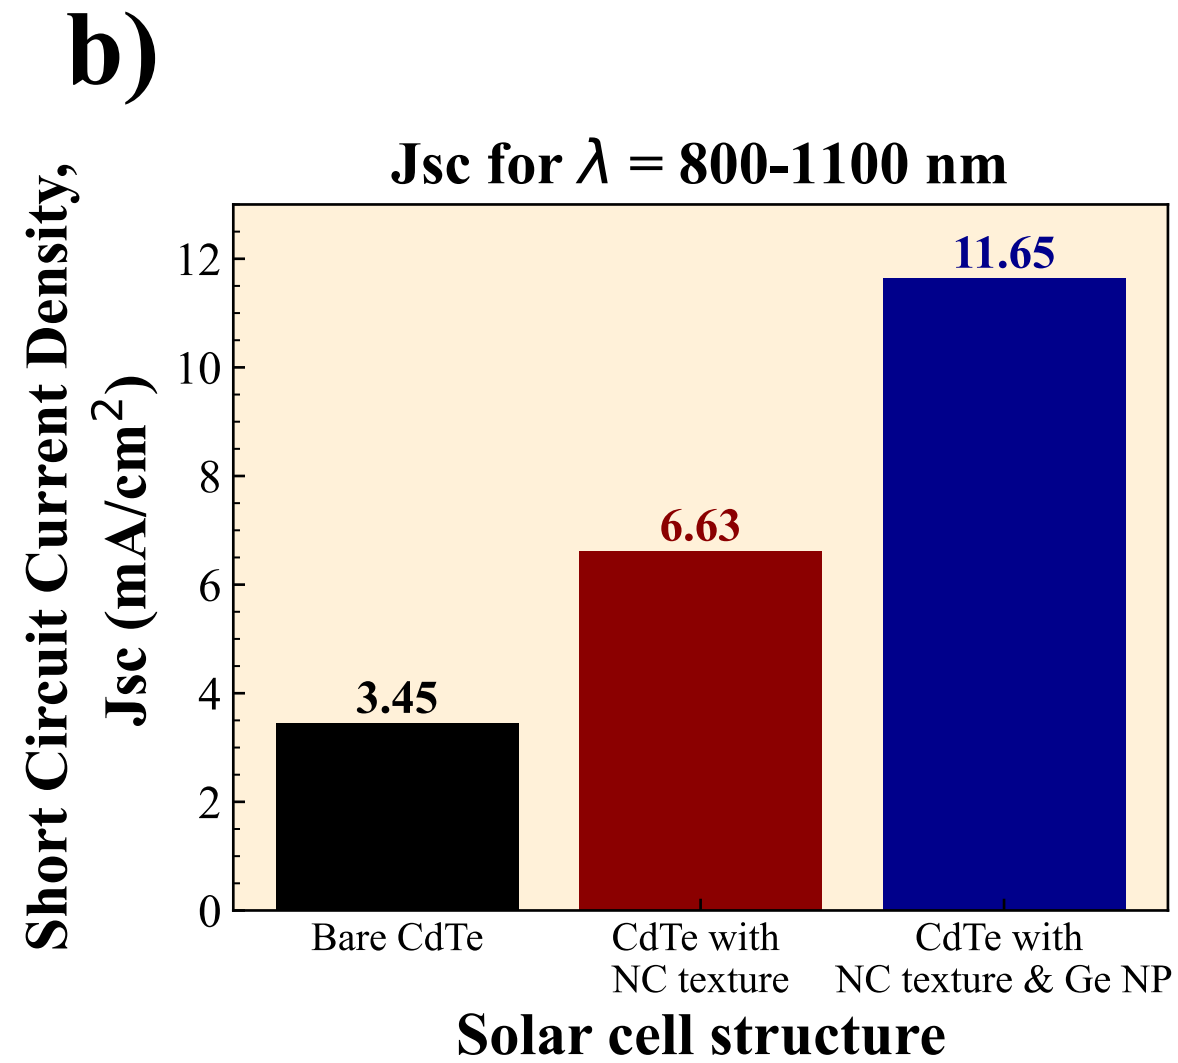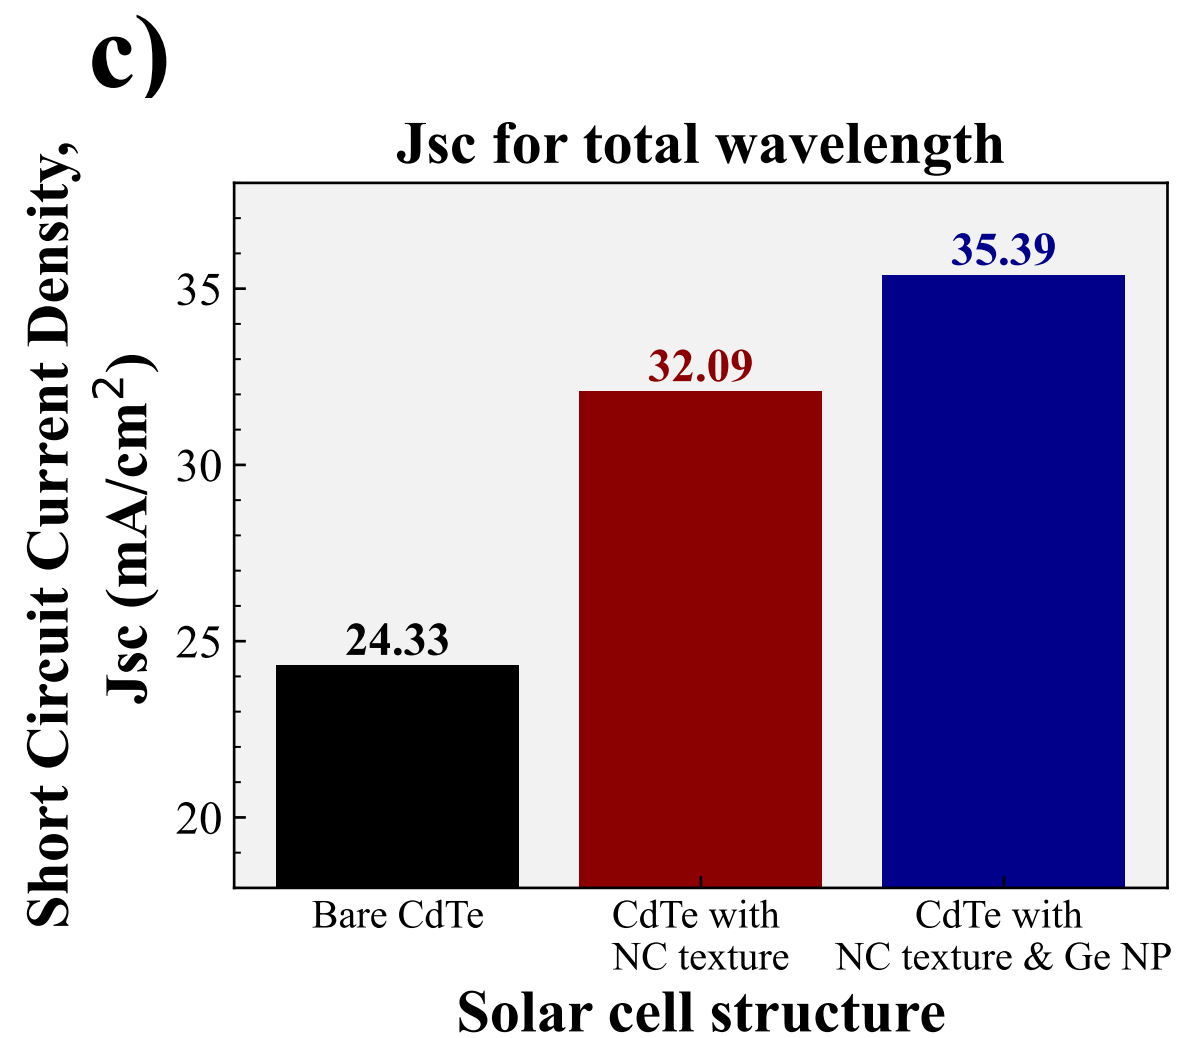

Supplement: d5na00325c7.pdf [file d5na00325c7.pdf]
